# Supplementary material
Source: PubMed Central journal article supplement (PMC5121017)
Supplement: NIHMS816407-supplement-1.pdf [file NIHMS816407-supplement-1.pdf]

Supplementary Figure 1: NF- $\kappa$ B inhibition decreases *in vitro* migration and invasion: Triptolide decreases (a) KPC cellular migration as determined by ECIS; (b) KPC Boyden chamber invasion; and (c) MIA PaCa-2 and S2-013 Boyden chamber invasion. Each bar is representative of three or more independent experiments; error bars are represented in SEM; and the asterisk (\*) indicates a p value < 0.05.
